# Supplementary material for: An immunoevasive strategy through clinically-relevant pan-cancer genomic and transcriptomic alterations of JAK-STAT signaling components
Source: PubMed Central journal article supplement (PMC6829980; doi:10.1186/s10020-019-0114-1), 2019-11-04
Supplement: 10020_2019_114_MOESM4_ESM.pdf [file 10020_2019_114_MOESM4_ESM.pdf]

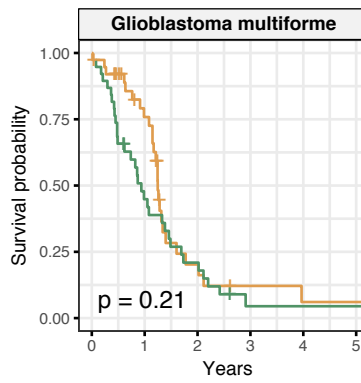

Number at risk

|    | 0  | 1  | 2 | 3 | 4 | 5 |
|----|----|----|---|---|---|---|
| Q1 | 38 | 23 | 5 | 2 | 1 | 1 |
| Q4 | 38 | 15 | 7 | 1 | 1 | 1 |

Years
